# Supplementary material
Source: PubMed Central journal article supplement (PMC3415543)
Supplement: mmc1.pdf [file mmc1.pdf]

## Supplemental Data

### Genomic Patterns of Homozygosity in Worldwide Human Populations

Trevor J. Pemberton, Devin Absher, Marcus W. Feldman, Richard M. Myers, Noah A. Rosenberg, and Jun Z. Li

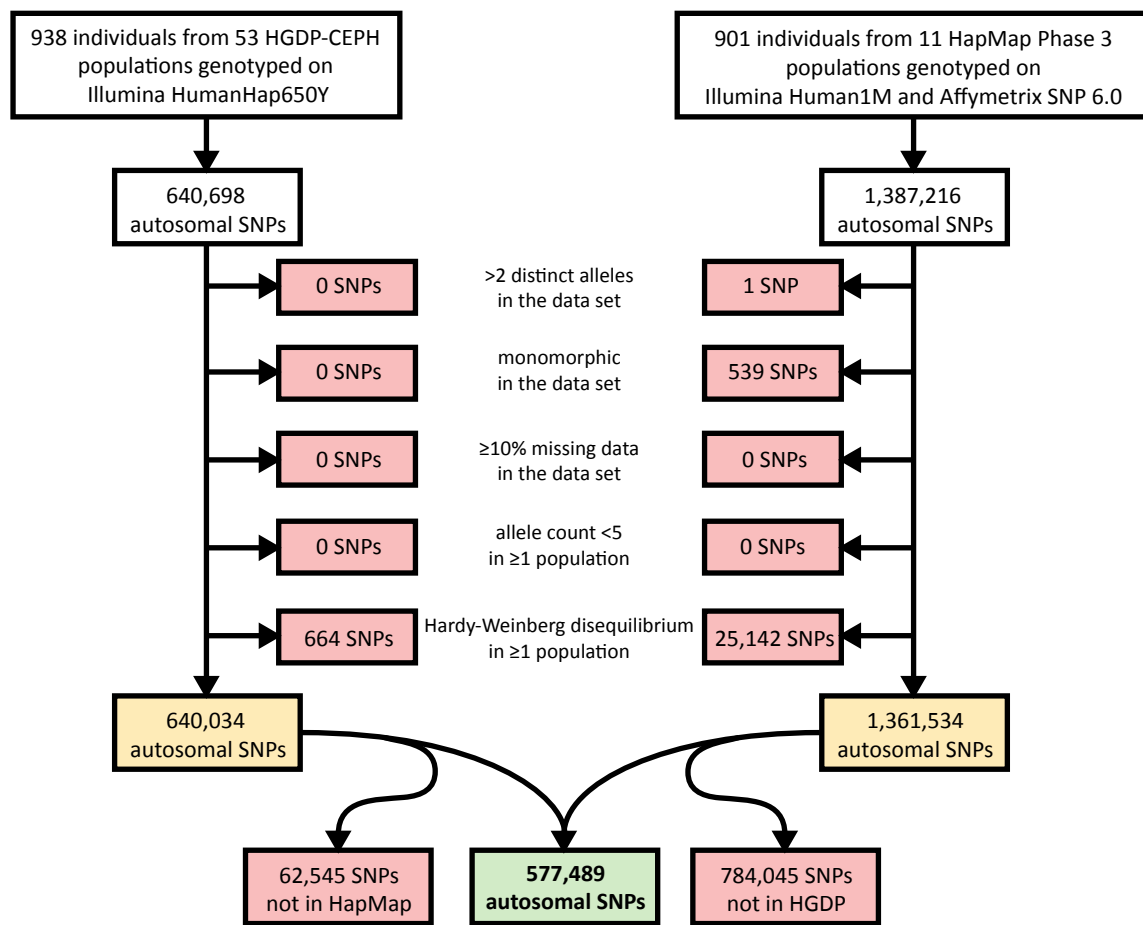

**Figure S1. Flow Diagram of the Sequential Data Filtering Steps Used for Preparation of the Combined Data Set**

Steps are shown in the order in which they were applied. SNPs that failed in one step were removed and were not considered in subsequent steps. The numbers of SNPs removed at each step are shown in the boxes shaded in red, the final numbers of SNPs in the two data sets are shown in the boxes shaded in orange, and the final number of SNPs in the combined data set is shown in the box shaded in green.

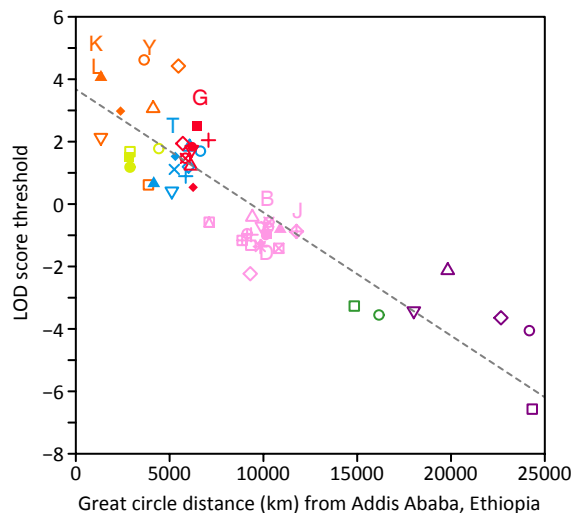

| <u>AFRICA</u>       | <u>MIDDLE EAST</u> | <u>EUROPE</u> | <u>C/S ASIA</u> | <u>EAST ASIA</u> |                  | <u>OCEANIA</u> | <u>AMERICAS</u> |
|---------------------|--------------------|---------------|-----------------|------------------|------------------|----------------|-----------------|
| K MKK               | ■ Bedouin          | ▲ Adygei      | ◇ Makrani       | ■ Xibo           | ● Han            | □ Papuan       | △ Maya          |
| L LWK               | ● Druze            | ▼ Tuscan      | × Balochi       | ■ Tu             | × Han (N. China) | ○ Melanesian   | ▽ Pima          |
| ▽ Mbuti Pygmy       | □ Palestinian      | T TSI         | ○ Brahui        | ● Naxi           | B CHB            |                | ◇ Colombian     |
| ▲ Bantu (Kenya)     | ○ Mozabite         | × Italian     | △ Hazara        | ◇ Lahu           | D CHD            |                | ○ Karitiana     |
| ◆ Biaka Pygmy       |                    | ◆ Sardinian   | ▽ Pathan        | □ Yi             | ■ Daur           |                | □ Surui         |
| ○ Yoruba            |                    | + French      | ● Sindhi        | + Dai            | ○ Cambodian      |                |                 |
| Y YRI               |                    | ◇ Basque      | ◆ Kalash        | △ Mongola        | ■ Oroqen         |                |                 |
| □ San               |                    | ▲ Russian     | ■ Burusho       | * Tujia          | ■ She            |                |                 |
| △ Bantu (S. Africa) |                    | ○ Orcadian    | G GIH           | ◆ Miao           | ▲ Hezhen         |                |                 |
| ◇ Mandenka          |                    |               | + Uygur         | ▽ Yakut          | ◇ Japanese       |                |                 |
|                     |                    |               |                 |                  | J JPT            |                |                 |

**Figure S2. The Decrease of the LOD-Score Threshold with Geographic Distance from Addis Ababa, Ethiopia, an Approximate Location for the Origin of the Out-of-Africa Migration**

The coefficient of determination is  $R^2=0.757$ . The LOD score thresholds from 61 of the 64 populations are included: the ASW and MXL populations were excluded as they represent admixed populations, and the CEU population was excluded as it represents general Northern European ancestry rather than individuals from a specific location. Populations are colored by their regional affiliation.

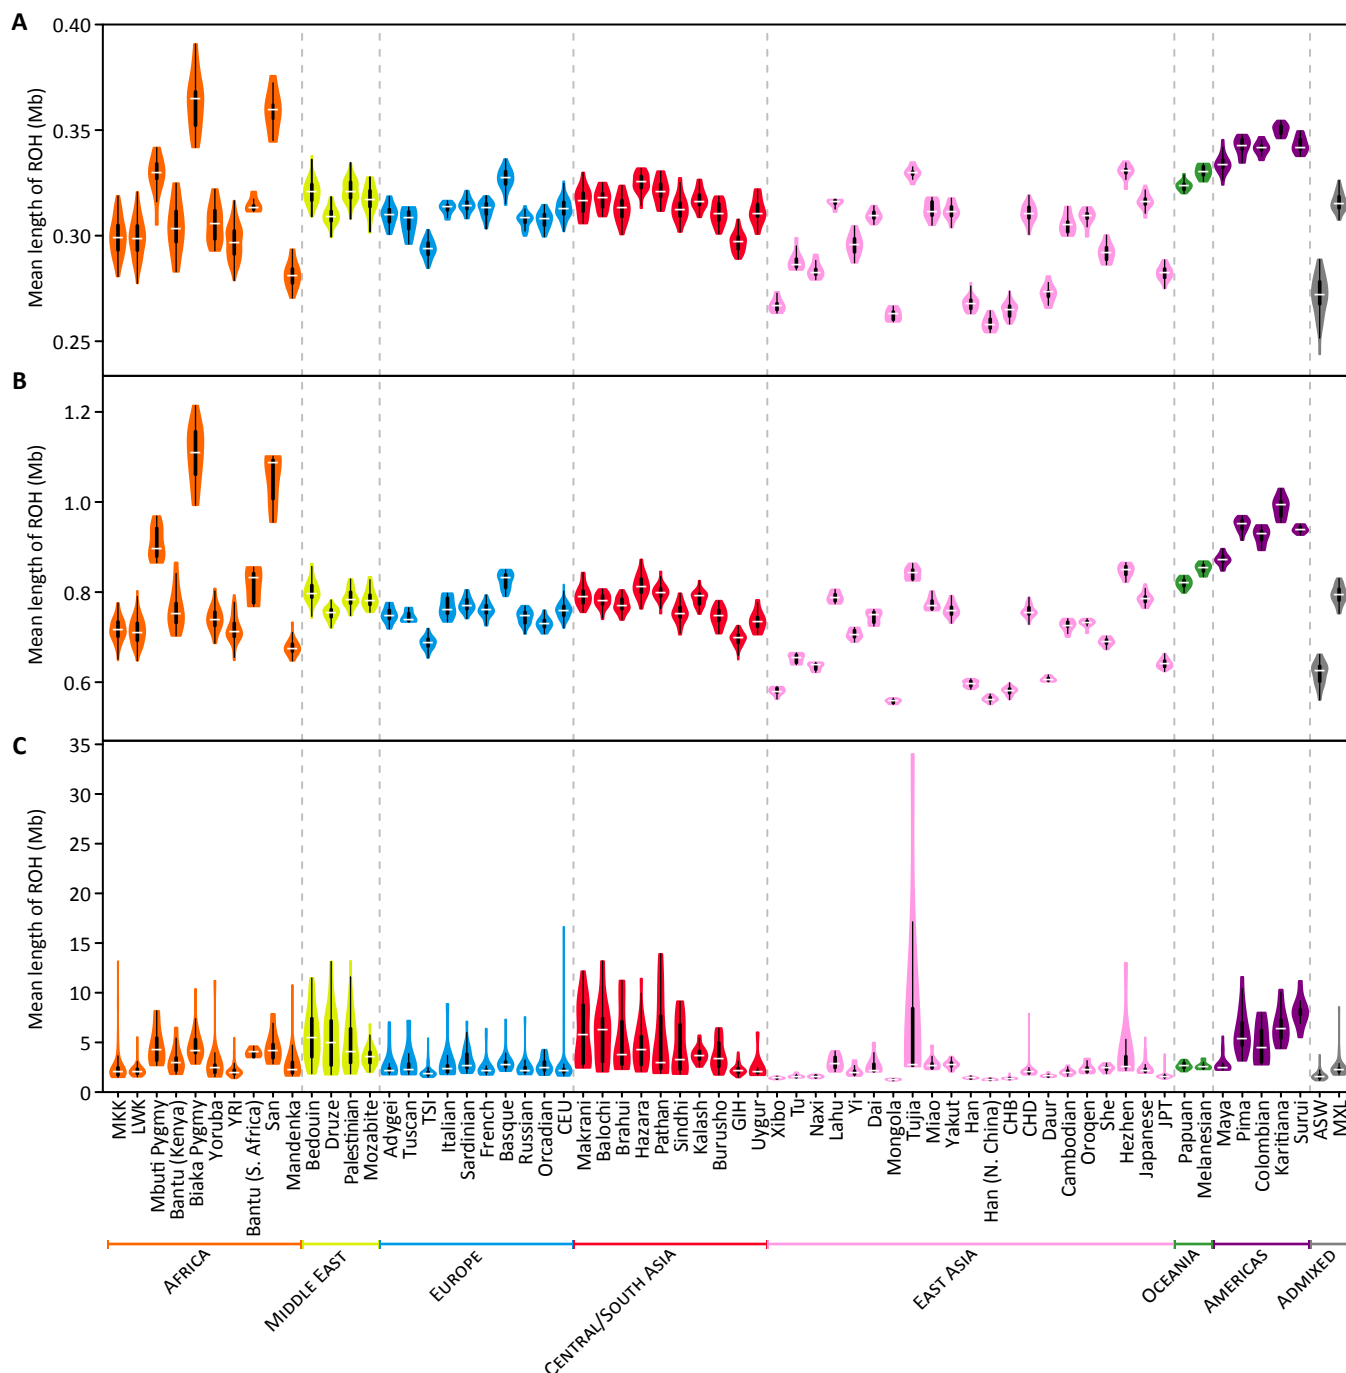

**Figure S3. Mean ROH Length for Each of the Three Size Classes in Each Population**

(A) Class A ROH, (B) class B ROH, and (C) class C ROH. Populations are ordered from left to right by geographic affiliation, and within geographic regions from left to right by increasing geographic distance from Addis Ababa, Ethiopia, and they are colored by their geographic affiliation. Vertical dashed gray lines mark the boundaries between populations from different geographic regions.

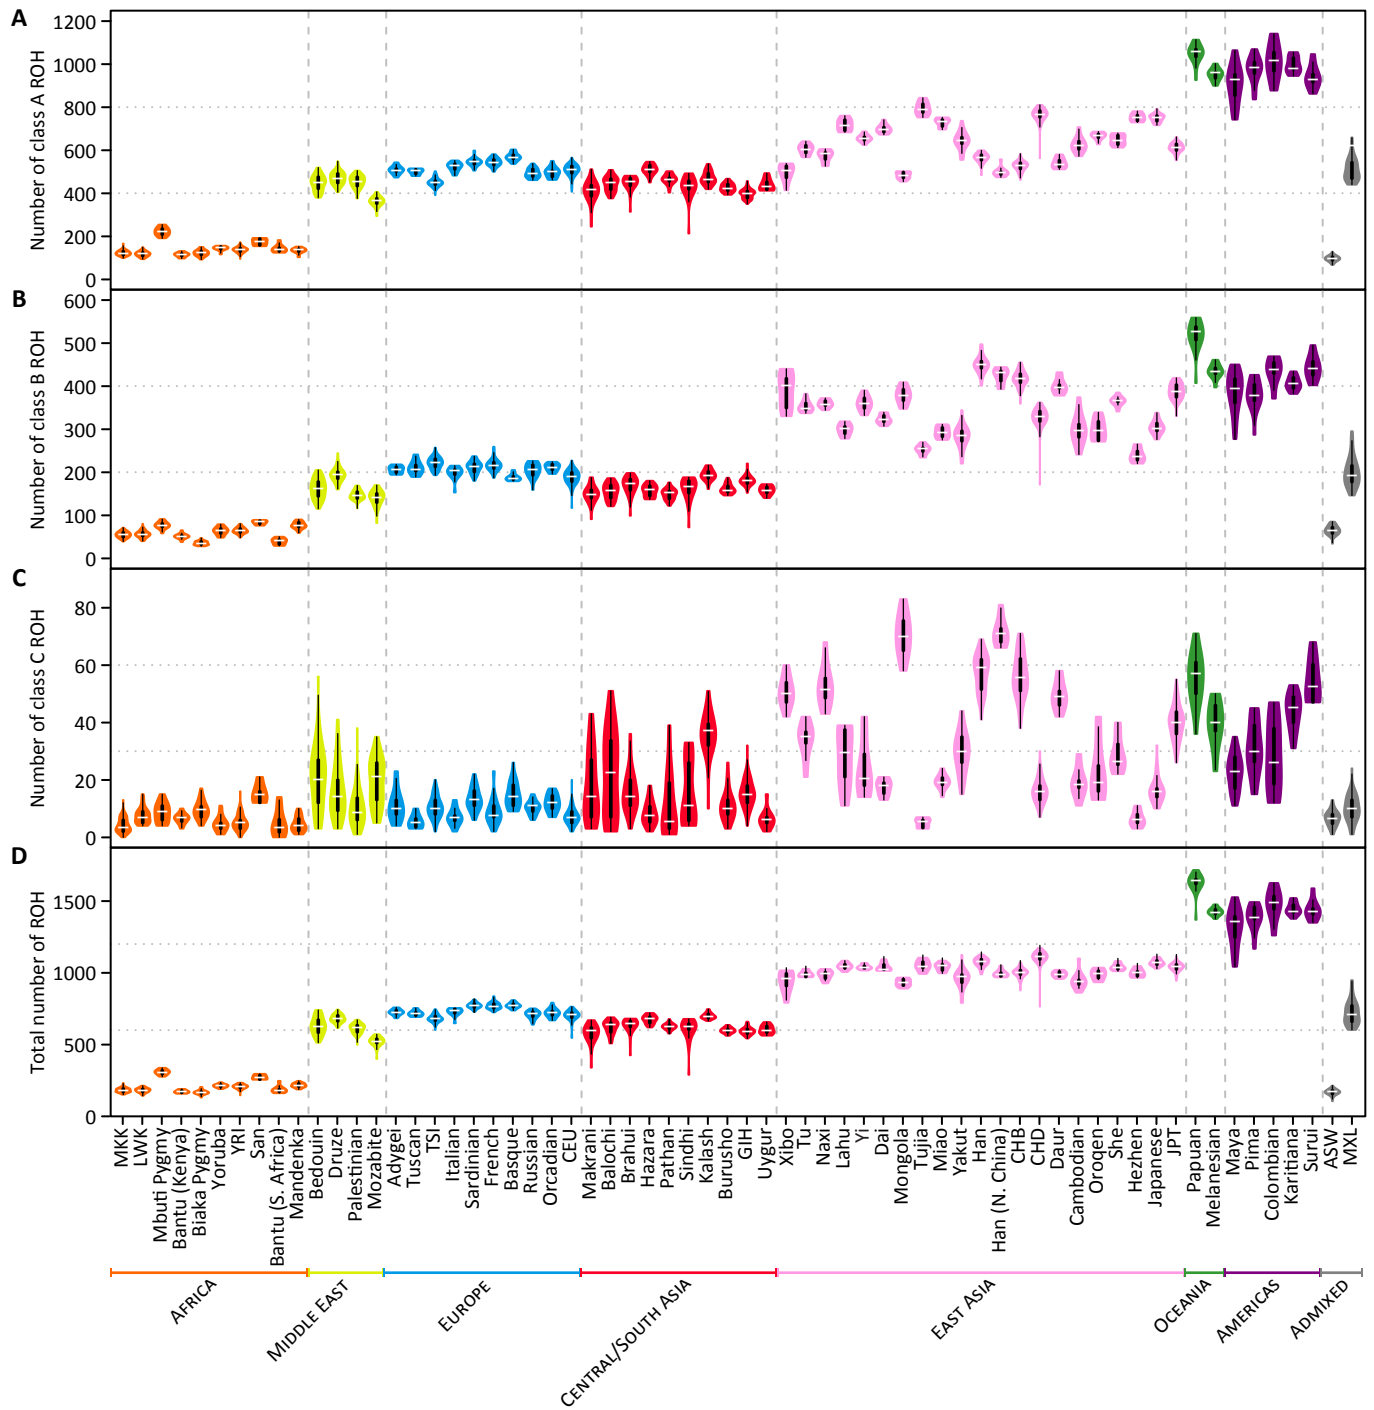

**Figure S4. Total Numbers of ROH in Individual Genomes**

(A) Total number of class A ROH, (B) total number of class B ROH, (C) total number of class C ROH, and (D) total number of ROH across all three classes, in each of the 53 HGDP-CEPH populations and the 11 HapMap Phase III populations. Populations are ordered from left to right by geographic affiliation, and within geographic regions from left to right by increasing geographic distance from Addis Ababa, Ethiopia. Vertical dashed gray lines mark the boundaries between populations from different geographic regions.



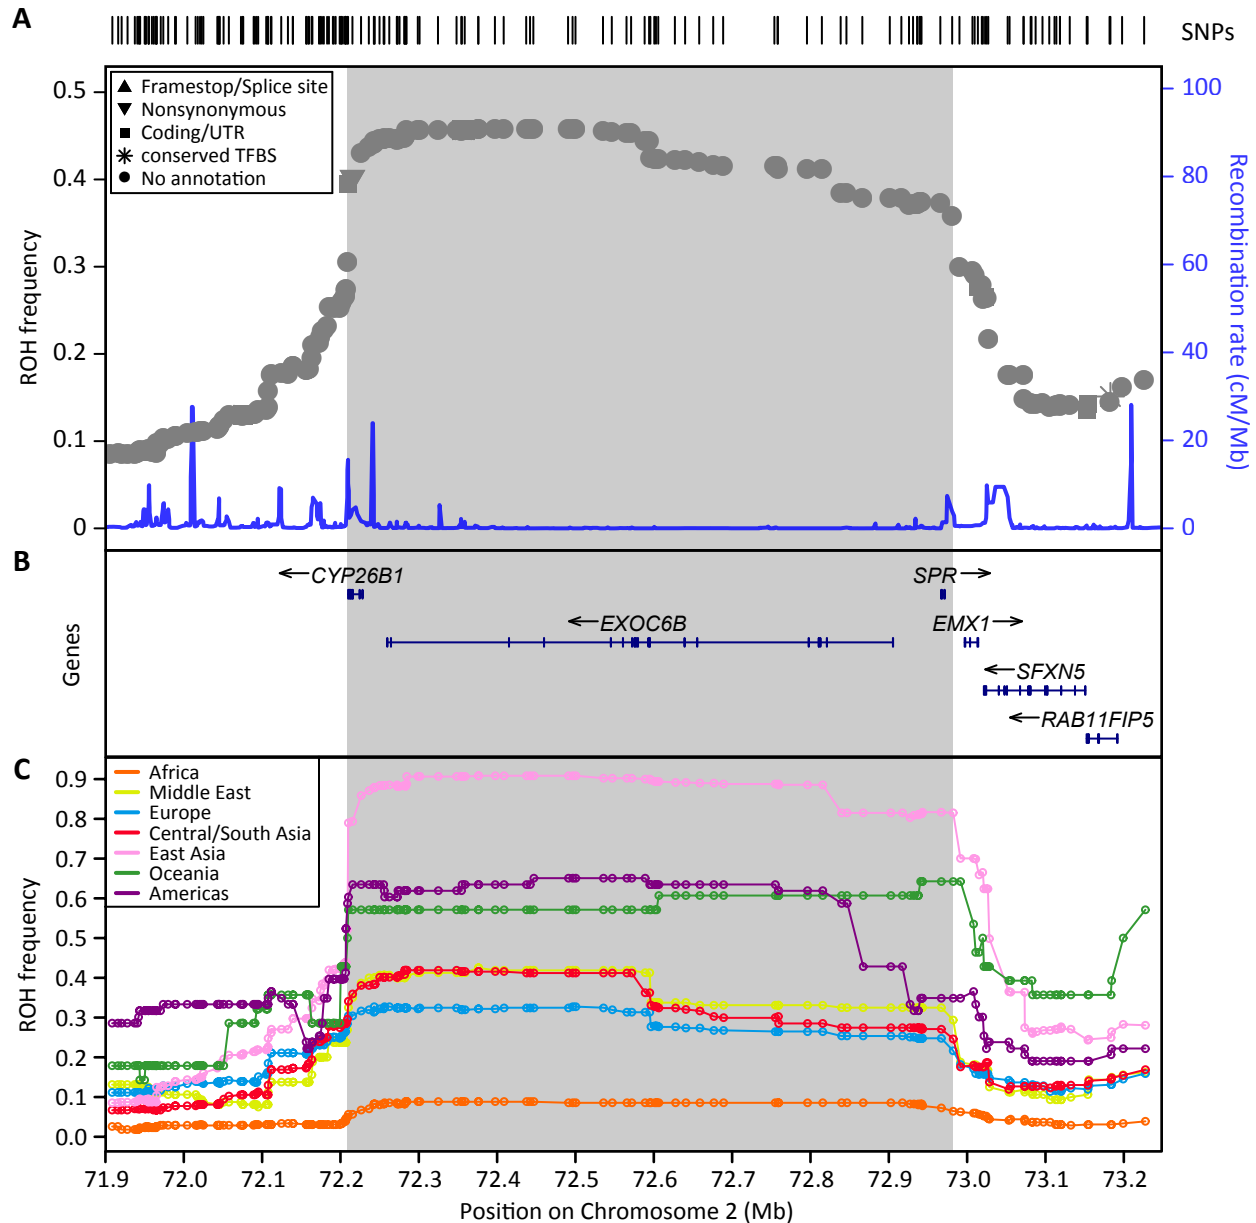

**Figure S5. The Top-Ranked ROH Hot Spot on Human Autosomes**

(A) ROH frequency calculated over all three size classes and over all populations, plotted against position on chromosome 2. The gray box indicates the location of the top-ranked ROH hotspot (Table 1). Population-based estimates of recombination rate are shown for release 22 of HapMap Phase II<sup>1</sup> (blue line). (B) Gene locations in release hg18 of the UCSC database.<sup>2</sup> (C) ROH frequency calculated over all three size classes, shown separately for each geographic region. Parts (A) and (B) were plotted using LocusZoom.<sup>3</sup> Abbreviations: UTR, untranslated region; TFBS, transcription factor binding site.

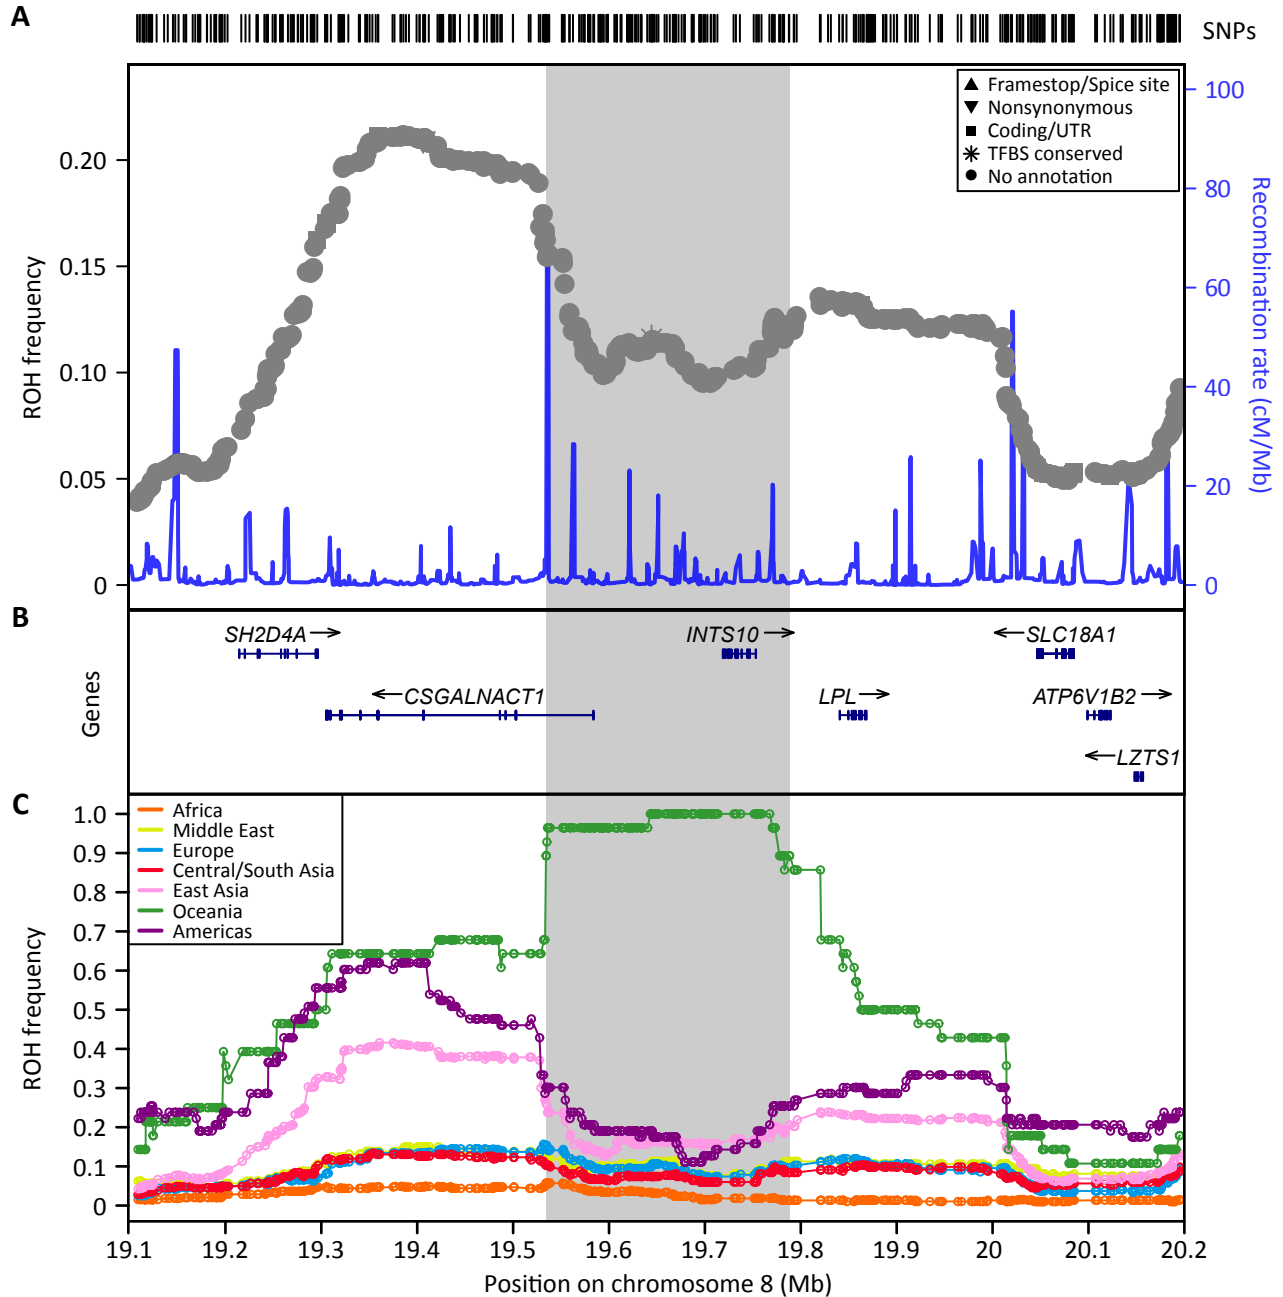

**Figure S6. The Top-Ranked ROH Hot Spot on Human Autosomes in Oceanians**

(A) ROH frequency calculated over all three size classes and over all populations, plotted against position on chromosome 8. The gray box indicates the location of the top-ranked ROH hotspot in Oceanians (Table S6). Population-based estimates of recombination rate are shown for release 22 of HapMap Phase II<sup>1</sup> (blue line). (B) Gene locations in release hg18 of the UCSC database.<sup>2</sup> (C) ROH frequency calculated over all three size classes, shown separately for each geographic region. Parts (A) and (B) were plotted using LocusZoom.<sup>3</sup> Abbreviations: UTR, untranslated region; TFBS, transcription factor binding site.

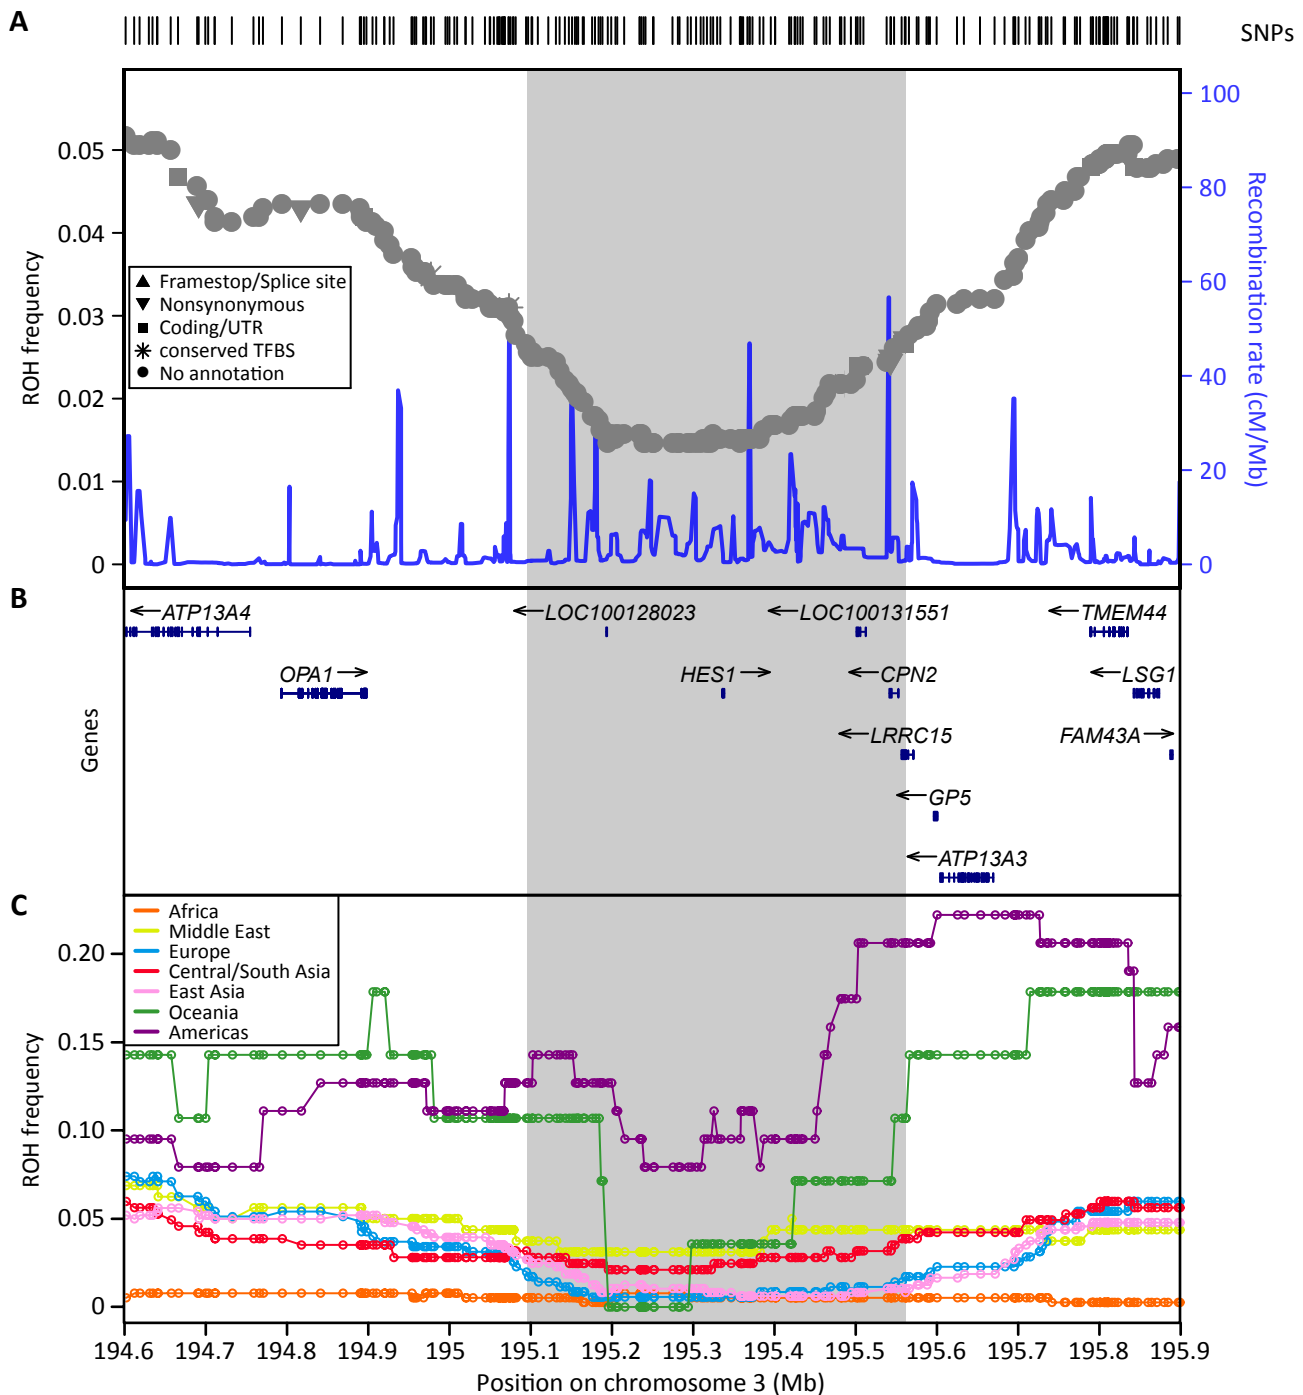

**Figure S7. The Top-Ranked ROH Cold Spot on Human Autosomes**

(A) ROH frequency calculated over all three size classes and over all populations, plotted against position on chromosome 3. The gray box indicates the location of the top-ranked ROH coldspot (Table 2). Population-based estimates of recombination rate are shown for release 22 of HapMap Phase II<sup>1</sup> (blue line). (B) Gene locations in release hg18 of the UCSC database.<sup>2</sup> (C) ROH frequency calculated over all three size classes, shown separately for each geographic region. Parts (A) and (B) were plotted using LocusZoom.<sup>3</sup> Abbreviations: UTR, untranslated region; TFBS, transcription factor binding site.

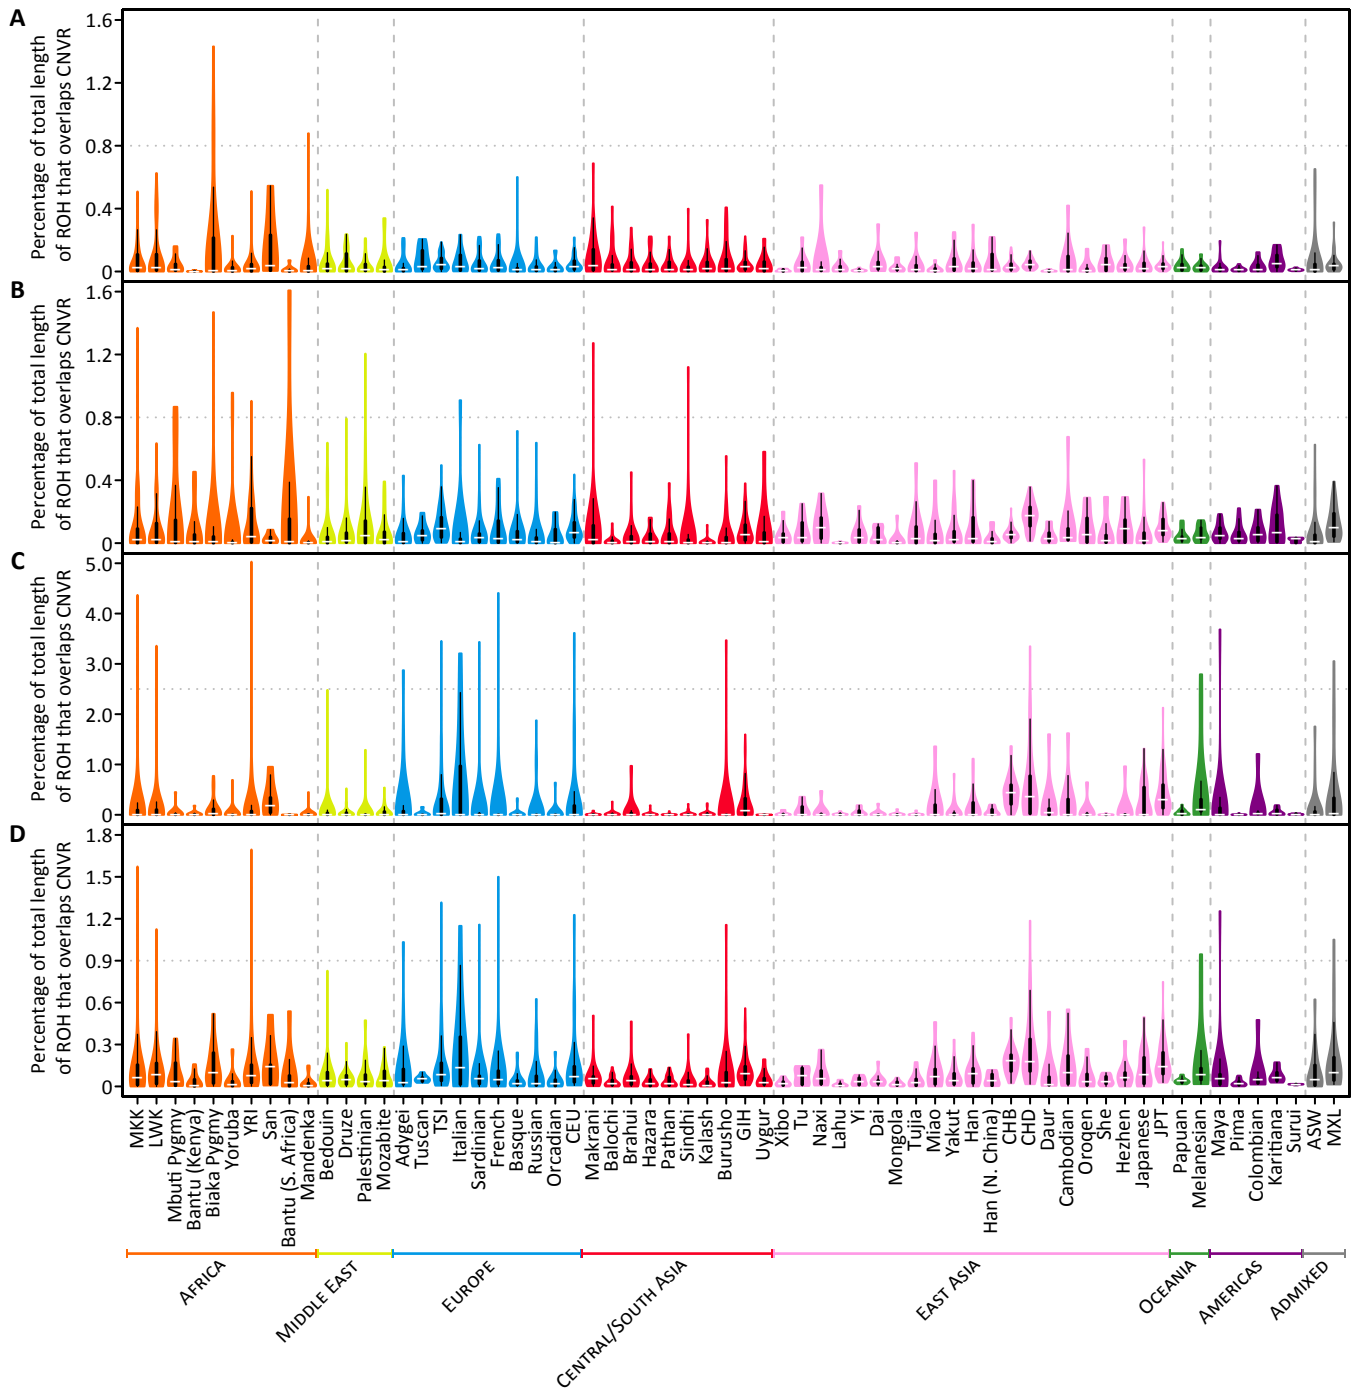

**Figure S8. Overlap of ROH and CNVR in Individual Genomes**

The percentage of total lengths of (A) class A ROH, (B) class B ROH, (C) class C ROH, and (D) ROH across all three classes in individual genomes that overlap CNVR identified in those genomes, in each of the 53 HGDP-CEPH populations and the 11 HapMap Phase III populations. Populations are ordered from left to right by geographic affiliation, and within geographic regions from left to right by increasing geographic distance from Addis Ababa, Ethiopia. Vertical dashed gray lines mark the boundaries between populations from different geographic regions. CNVR for the 938 individuals in the HGDP-CEPH data set were obtained from the HGDP Selection Browser (downloaded March 8<sup>th</sup>, 2010), and CNVR for the 901 individuals in the HapMap data set were obtained from Release 2 of HapMap Phase III<sup>4</sup> (downloaded January 27<sup>th</sup>, 2011).

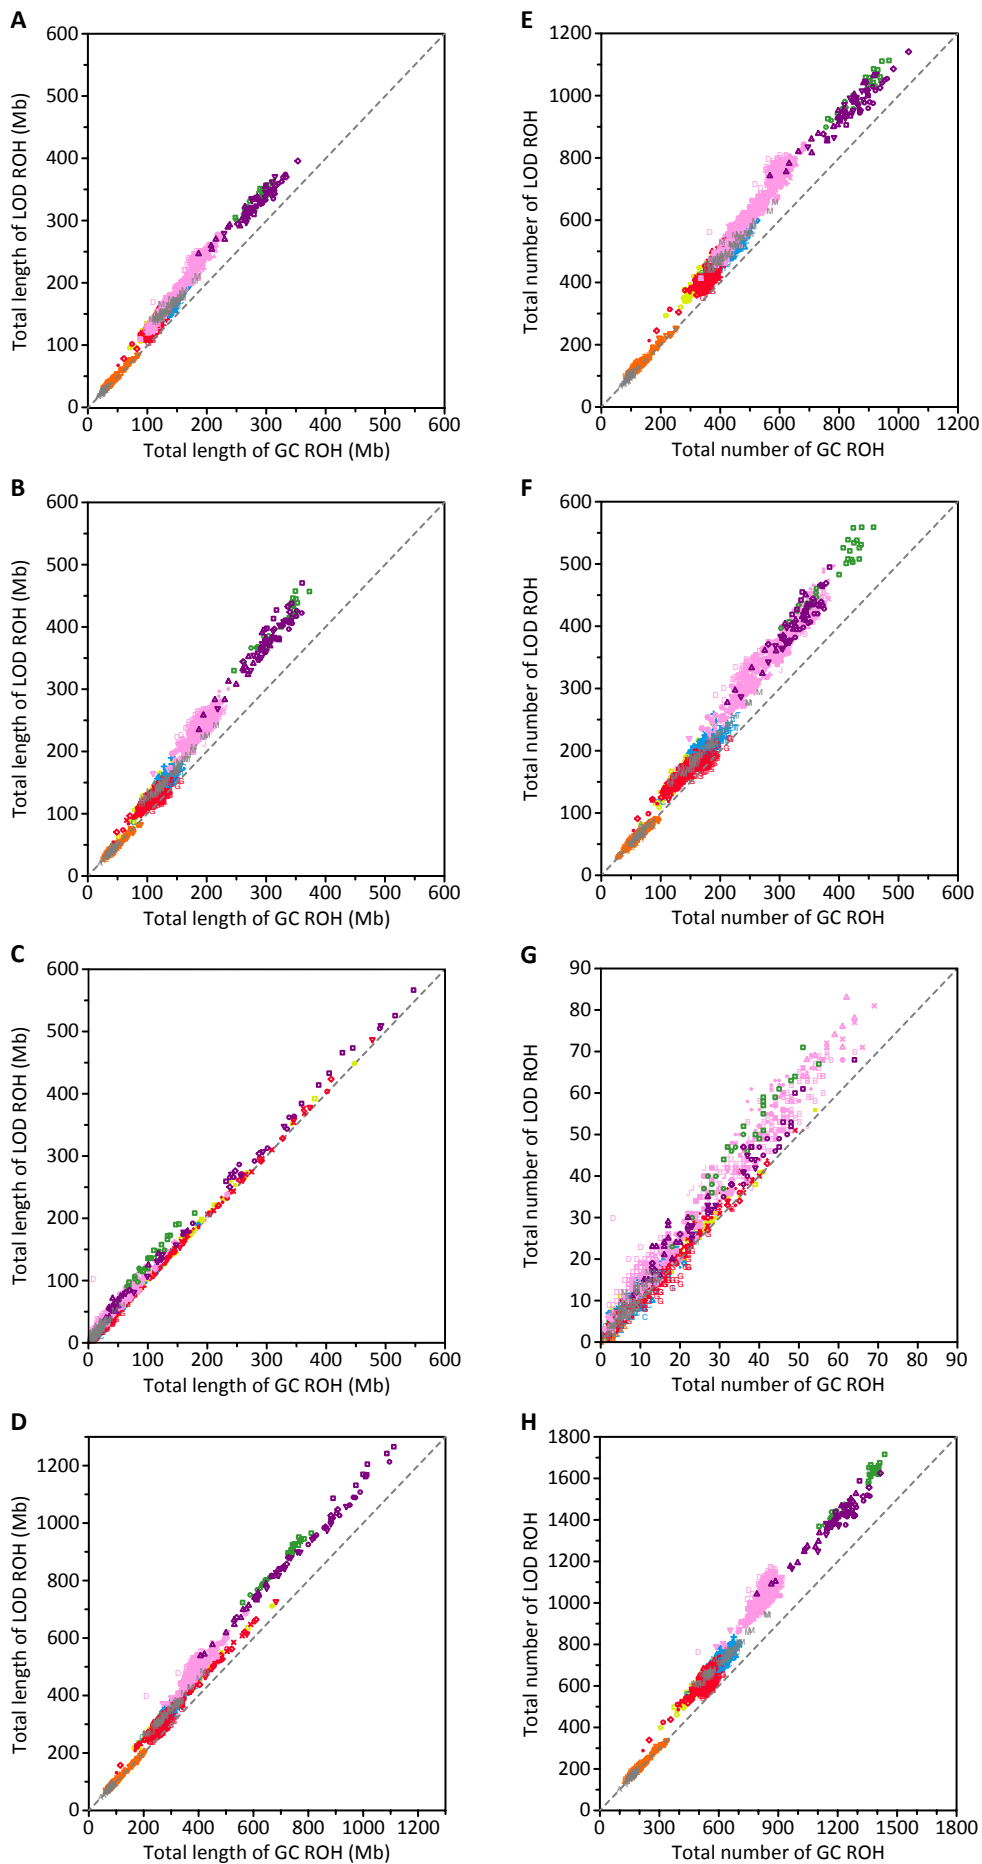

**Figure S9. Comparison of per-Individual Total ROH Lengths and Numbers Detected via Likelihood-Based and Genotype-Counting Methods**

Comparisons of per-individual total lengths (A-D) and total numbers (E-H) of class A ROH (A & E), class B ROH (B & F), class C ROH (C & G), and all three ROH classes combined (D & H), identified using the likelihood-based (LOD) method and the genotype counting (GC) method. Both methods were applied concurrently to the genotype data using a sliding window of 60 SNPs, and ROH were classified using the same boundary sizes (Table S1). When determining the homozygosity status of a window using the GC method, we used the criteria of McQuillan *et al.*:<sup>5</sup>  $\leq 1$  heterozygous and  $\leq 5$  missing genotypes per window, mean SNP density of  $\leq 50\text{kb}/\text{SNP}$  per window, and a maximum gap between two consecutive homozygous SNPs of 100 kb. Populations are indicated by the same symbols as in Figure 4.

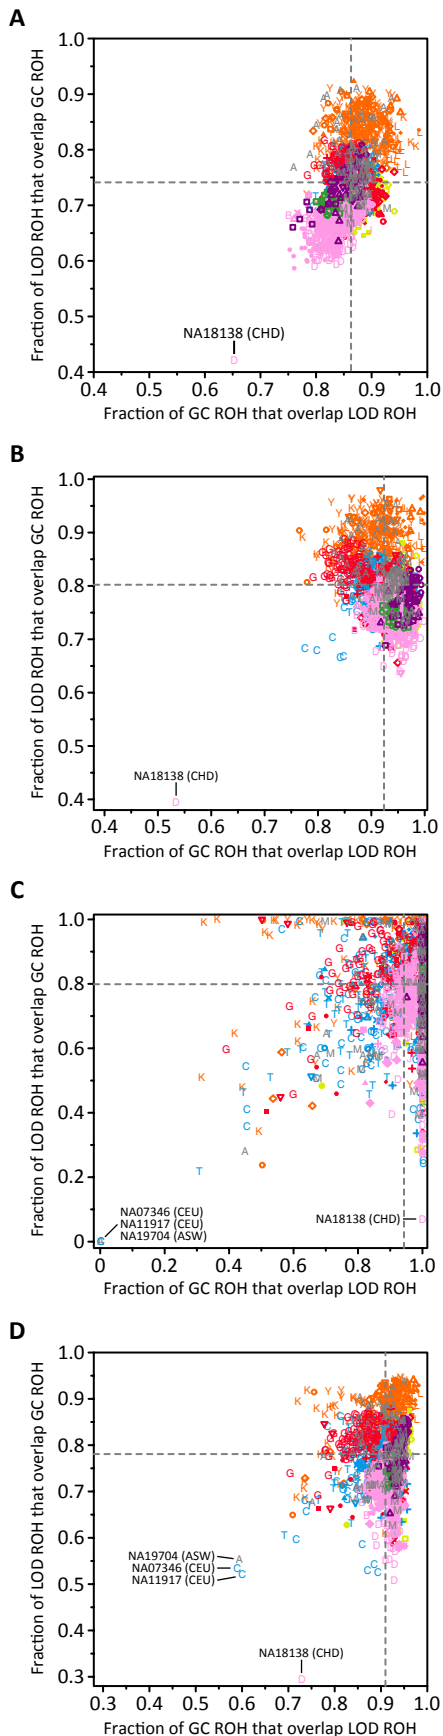

**Figure S10. Overlap of ROH Detected in Individual Genomes via Likelihood-Based and Genotype-Counting Methods.**

The fractions of per-individual total lengths of ROH identified using the likelihood-based (LOD) method that overlap ROH identified using a genotype-counting (GC) method, against the fractions of per-individual total lengths of ROH identified using the GC method that overlap ROH identified using the LOD method, shown separately for (A) class A ROH, (B) class B ROH, (C) class C ROH, and (D) all three ROH classes combined. Both methods were applied concurrently to the genotype data using a sliding window of 60 SNPs, and ROH were classified using the same boundary sizes (Table S1). When determining the homozygosity status of a window using the GC method, the criteria of McQuillan et al. were used:<sup>5</sup>  $\leq 1$  heterozygous and  $\leq 5$  missing genotypes per window, mean SNP density of  $\leq 50\text{kb}/\text{SNP}$  per window, and a maximum gap between two consecutive homozygous SNPs of 100 kb. Populations are indicated by the same symbols as in Figure 4. Vertical and horizontal dashed gray lines mark the mean fraction across individuals.

**Table S1. Number of Sampled Individuals, LOD-Score Thresholds for ROH Identification, and ROH-Class Boundary Sizes for Each Population**

| Population        | Geographic region  | Number of individuals | LOD score threshold | Boundary size (bp) |             |
|-------------------|--------------------|-----------------------|---------------------|--------------------|-------------|
|                   |                    |                       |                     | Class A & B        | Class B & C |
| MKK               | Africa             | 96                    | 5.1558              | 486325.5           | 1416826     |
| LWK               | Africa             | 80                    | 4.4026              | 481590             | 1315546     |
| Mbuti Pygmy       | Africa             | 13                    | 2.1320              | 578239             | 1909271     |
| Bantu (Kenya)     | Africa             | 11                    | 4.0622              | 498712             | 1504027     |
| Biaka Pygmy       | Africa             | 22                    | 2.9786              | 676619             | 2149528     |
| Yoruba            | Africa             | 21                    | 4.6202              | 502478.5           | 1528850     |
| YRI               | Africa             | 108                   | 5.0270              | 482406             | 1392595.5   |
| San               | Africa             | 5                     | 0.6153              | 526971.5           | 1624711.5   |
| Bantu (S. Africa) | Africa             | 8                     | 3.0647              | 656043.5           | 2095438.5   |
| Mandenka          | Africa             | 22                    | 4.4230              | 451395             | 1440635     |
| Bedouin           | Middle East        | 45                    | 1.5238              | 540741             | 1689397     |
| Druze             | Middle East        | 42                    | 1.1807              | 508043             | 1626172     |
| Palestinian       | Middle East        | 46                    | 1.6782              | 543776.5           | 1690271.5   |
| Mozabite          | Middle East        | 27                    | 1.7775              | 528280             | 1547785.5   |
| Adygei            | Europe             | 17                    | 0.6601              | 508659.5           | 1546061     |
| Tuscan            | Europe             | 7                     | 0.4139              | 503582             | 1629045.5   |
| TSI               | Europe             | 88                    | 2.5330              | 467503             | 1364957.5   |
| Italian           | Europe             | 12                    | 1.1112              | 521248.5           | 1667341     |
| Sardinian         | Europe             | 28                    | 1.5279              | 520803             | 1584867     |
| French            | Europe             | 28                    | 0.8937              | 516212             | 1605528.5   |
| Basque            | Europe             | 24                    | 1.1949              | 560403             | 1689209     |
| Russian           | Europe             | 25                    | 1.8286              | 502367             | 1539373.5   |
| Orcadian          | Europe             | 15                    | 1.6998              | 498705.5           | 1452138.5   |
| CEU               | Europe             | 107                   | 2.4146              | 517859.5           | 1598844     |
| Makrani           | Central/South Asia | 25                    | 1.9411              | 530031             | 1687202     |
| Balochi           | Central/South Asia | 24                    | 1.4637              | 533668             | 1650771.5   |
| Brahui            | Central/South Asia | 25                    | 1.4727              | 521952.5           | 1662551.5   |
| Hazara            | Central/South Asia | 22                    | 1.2210              | 557995.5           | 1770782     |
| Pathan            | Central/South Asia | 22                    | 1.7475              | 545900.5           | 1756266.5   |
| Sindhi            | Central/South Asia | 24                    | 1.8343              | 517691.5           | 1590812.5   |
| Kalash            | Central/South Asia | 23                    | 0.5359              | 524842.5           | 1539702     |
| Burusho           | Central/South Asia | 25                    | 2.4869              | 514483             | 1570643.5   |
| GIH               | Central/South Asia | 84                    | 3.4214              | 475476             | 1336163.5   |
| Uygur             | Central/South Asia | 10                    | 2.0470              | 511274.5           | 1526191     |
| Xibo              | East Asia          | 9                     | -0.5799             | 394403             | 994858      |
| Tu                | East Asia          | 10                    | -1.1635             | 443416.5           | 1155318.5   |
| Naxi              | East Asia          | 8                     | -0.9561             | 433261             | 1078375.5   |
| Lahu              | East Asia          | 8                     | -2.2314             | 522309.5           | 1570839     |
| Yi                | East Asia          | 10                    | -1.3182             | 470292             | 1386313     |
| Dai               | East Asia          | 10                    | -0.9820             | 504613             | 1528287     |
| Mongola           | East Asia          | 10                    | -0.4183             | 386535.5           | 896699      |

|                |           |    |         |          |           |
|----------------|-----------|----|---------|----------|-----------|
| Tujia          | East Asia | 10 | -1.3610 | 571092   | 2050719.5 |
| Miao           | East Asia | 10 | -1.2605 | 517903.5 | 1556154   |
| Yakut          | East Asia | 25 | -0.7117 | 508864   | 1478092   |
| Han            | East Asia | 34 | -1.0061 | 399176.5 | 1030188.5 |
| Han (N. China) | East Asia | 10 | -0.7204 | 379554.5 | 922650.5  |
| CHB            | East Asia | 84 | 0.1686  | 391738.5 | 985513    |
| CHD            | East Asia | 82 | -1.5498 | 509342.5 | 1535983.5 |
| Daur           | East Asia | 9  | -0.9591 | 411640.5 | 1078310   |
| Oroqen         | East Asia | 9  | -0.5794 | 501657.5 | 1430606   |
| Cambodian      | East Asia | 10 | -0.7541 | 491889   | 1380519   |
| She            | East Asia | 10 | -1.4174 | 460755.5 | 1354487.5 |
| Hezhen         | East Asia | 9  | -0.8060 | 567854.5 | 1938313   |
| Japanese       | East Asia | 28 | -0.8764 | 525941   | 1600258.5 |
| JPT            | East Asia | 86 | -0.2048 | 434021.5 | 1144317   |
| Papuan         | Oceania   | 17 | -3.2671 | 533037   | 1580777.5 |
| Melanesian     | Oceania   | 11 | -3.5557 | 554474.5 | 1654959.5 |
| Maya           | America   | 21 | -2.1264 | 562835.5 | 1799162.5 |
| Pima           | America   | 14 | -3.4241 | 597895   | 2137062   |
| Colombian      | America   | 7  | -3.6430 | 585419.5 | 2067894.5 |
| Karitiana      | America   | 13 | -4.0559 | 615621.5 | 2191780.5 |
| Surui          | America   | 8  | -6.5691 | 586472.5 | 2115337   |
| ASW            | Admixed   | 40 | 5.4990  | 414633.5 | 1129271   |
| MXL            | Admixed   | 46 | 1.7014  | 526641   | 1623921   |

The ranges of the boundaries are the shaded areas of **Figure 2C**.



**Table S6. The Top-Ranked ROH Hot Spot on Human Autosomes in Each Geographic Region**

| Geographic region               | Chr | Genomic region (kb) |         |        | ROH frequency |       |        | Content                                                                                                          |
|---------------------------------|-----|---------------------|---------|--------|---------------|-------|--------|------------------------------------------------------------------------------------------------------------------|
|                                 |     | Begin               | End     | Length | Max           | Mean  | St Dev | RefSeq Genes                                                                                                     |
| Africa                          | 18  | 64,153              | 64,250  | 97     | 0.187         | 0.179 | 0.011  | -                                                                                                                |
| Middle East <sup>a</sup>        | 15  | 69,852              | 70,666  | 814    | 0.563         | 0.510 | 0.068  | <i>ARIH1, C15orf34, CELF6, GRAMD2, <u>HEXA</u>,<sup>b</sup> MYO9A, NR2E3, PARP6, PKM2, SENP8, THSD4, TMEM202</i> |
| Europe <sup>a</sup>             | 15  | 69,858              | 70,640  | 782    | 0.521         | 0.485 | 0.054  |                                                                                                                  |
| Central/South Asia <sup>a</sup> | 15  | 69,863              | 70,666  | 803    | 0.479         | 0.449 | 0.034  |                                                                                                                  |
| East Asia <sup>c, d</sup>       | 2   | 72,210              | 73,026  | 817    | 0.909         | 0.854 | 0.074  | <i>CYP26B1, EMX1, EXOC6B, SFXN5, SPR</i>                                                                         |
| Oceania <sup>d</sup>            | 8   | 19,534              | 19,788  | 254    | 1             | 0.972 | 0.031  | <i>CSGALNACT1, INTS10</i>                                                                                        |
| Americas <sup>d</sup>           | 2   | 177,856             | 178,672 | 815    | 0.984         | 0.939 | 0.031  | <i><u>AGPS</u>,<sup>e</sup> <u>PDE11A</u>,<sup>f</sup> TTC30A, TTC30B, LOC100130691</i>                          |

Genes in **bold** and underlined are associated with autosomal dominant and autosomal recessive diseases, respectively, in the OMIM database.

<sup>a</sup>These regions overlap the eighth-ranked ROH hotspots in the full data set (**Table 1**).

<sup>b</sup>Tay-Sachs disease (MIM: 272800).

<sup>c</sup>This region overlaps the top-ranked ROH hotspot in the full data set (**Table 1**).

<sup>d</sup>These hotspots overlap regions identified in previous genomic surveys as probable targets of recent positive selection.<sup>6-9</sup>

<sup>e</sup>Rhizomelic chondrodysplasia punctata (MIM: 600121).

<sup>f</sup>Cushing syndrome (MIM: 610475).

**Table S7. The Top-Ranked ROH Cold Spot on Human Autosomes in Each Geographic Region**

| Geographic region      | Chr | Genomic region (kb) |         |        | ROH frequency |       |        | Content                                                                              |
|------------------------|-----|---------------------|---------|--------|---------------|-------|--------|--------------------------------------------------------------------------------------|
|                        |     | Begin               | End     | Length | Min           | Mean  | St Dev | RefSeq Genes                                                                         |
| Africa                 | 15  | 88,175              | 88,541  | 366    | 0             | 0     | 0.001  | <i>AP3S2, IDH2, SEMA4B, ZNF710</i>                                                   |
| Middle East            | 11  | 3,165               | 3,596   | 431    | 0.006         | 0.013 | 0.005  | <i>C11orf36, LOC650368, MRGPRE, MRGPRG, ZNF195</i>                                   |
| Europe                 | 18  | 3,436               | 3,606   | 170    | 0.003         | 0.004 | 0.002  | <i>DLGAP1, FLJ35776, <b>TGIF1</b><sup>a</sup></i>                                    |
| Central/South Asia     | 6   | 107,300             | 107,515 | 216    | 0.004         | 0.011 | 0.006  | <i>BEND3, C6orf203, LOC100422737</i>                                                 |
| East Asia <sup>b</sup> | 3   | 195,143             | 195,672 | 529    | 0.006         | 0.010 | 0.004  | <i>ATP13A3, CPN2, GP5, HES1, LRR15, LOC647323, LOC100128023, LOC100131551, LRR15</i> |
| Oceania                | 3   | 177,155             | 177,835 | 681    | 0             | 0.004 | 0.011  | -                                                                                    |
| Americas               | 3   | 126,174             | 126,318 | 144    | 0.016         | 0.043 | 0.028  | <i>HEG1, SLC12A8</i>                                                                 |

Genes in **bold** are associated with autosomal dominant diseases in the OMIM database.

<sup>a</sup>Holoprosencephaly (MIM:142946).

<sup>b</sup>This region overlaps the top-ranked ROH coldspot in the full data set (**Table 2**).

## **Additional Supplemental Tables**

### **Table S2. The Frequency of Class A ROH at Each SNP in the Combined Data Set**

ROH frequencies are given separately for each geographic region, as well as across all individuals in the data set.

### **Table S3. The Frequency of Class B ROH at Each SNP in the Combined Data Set**

ROH frequencies are given separately for each geographic region, as well as across all individuals in the data set.

### **Table S4. The Frequency of Class C ROH at Each SNP in the Combined Data Set**

ROH frequencies are given separately for each geographic region, as well as across all individuals in the data set.

### **Table S5. The Frequency of ROH Calculated over All Three Size Classes at Each SNP in the Combined Data Set**

ROH frequencies are given separately for each geographic region, as well as across all individuals in the data set.

## Supplemental References

1. The International HapMap Consortium. (2007). A second generation human haplotype map of over 3.1 million SNPs. *Nature* 449, 851-861.
2. Rhead, B., Karolchik, D., Kuhn, R.M., Hinrichs, A.S., Zweig, A.S., Fujita, P.A., Diekhans, M., Smith, K.E., Rosenbloom, K.R., Raney, B.J., et al. (2010). The UCSC Genome Browser database: update 2010. *Nucleic Acids Res* 38, D613-619.
3. Pruim, R.J., Welch, R.P., Sanna, S., Teslovich, T.M., Chines, P.S., Gliedt, T.P., Boehnke, M., Abecasis, G.R., and Willer, C.J. (2010). LocusZoom: regional visualization of genome-wide association scan results. *Bioinformatics* 26, 2336-2337.
4. The International HapMap 3 Consortium. (2010). Integrating common and rare genetic variation in diverse human populations. *Nature* 467, 52-58.
5. McQuillan, R., Leutenegger, A.L., Abdel-Rahman, R., Franklin, C.S., Pericic, M., Barac-Lauc, L., Smolej-Narancic, N., Janicijevic, B., Polasek, O., Tenesa, A., et al. (2008). Runs of homozygosity in European populations. *Am J Hum Genet* 83, 359-372.
6. Sabeti, P.C., Varilly, P., Fry, B., Lohmueller, J., Hostetter, E., Cotsapas, C., Xie, X., Byrne, E.H., McCarroll, S.A., Gaudet, R., et al. (2007). Genome-wide detection and characterization of positive selection in human populations. *Nature* 449, 913-918.
7. Williamson, S.H., Hubisz, M.J., Clark, A.G., Payseur, B.A., Bustamante, C.D., and Nielsen, R. (2007). Localizing recent adaptive evolution in the human genome. *PLoS Genet* 3, e90.
8. Coop, G., Pickrell, J.K., Novembre, J., Kudaravalli, S., Li, J., Absher, D., Myers, R.M., Cavalli-Sforza, L.L., Feldman, M.W., and Pritchard, J.K. (2009). The role of geography in human adaptation. *PLoS Genet* 5, e1000500.
9. Pickrell, J.K., Coop, G., Novembre, J., Kudaravalli, S., Li, J.Z., Absher, D., Srinivasan, B.S., Barsh, G.S., Myers, R.M., Feldman, M.W., et al. (2009). Signals of recent positive selection in a worldwide sample of human populations. *Genome Res* 19, 826-837.
